# Supplementary material for: Transcriptome analysis reveals immune-related gene expression changes with age in giant panda (Ailuropoda melanoleuca) blood
Source: Aging (Albany NY). 2019 Jan 14;11(1):249–62. doi: 10.18632/aging.101747 (PMC6339791; doi:10.18632/aging.101747)
Supplement: Supplementary Table 2 [file aging-11-101747-s003.xlsx]

## Sheet: age_degs
Supplementary Table 2. All differentially expressed genes in old giant pandas compared to young giant pandas.
Gene id	Gene symbol	Gene description	log2 Fold Change	FDR
MSTRG.22795	LOC100464025	SLA class II histocompatibility antigen, DQ haplotype D alpha chain	11.9697	0.0329329
MSTRG.17173			9.43491	0.0337816
MSTRG.14771	SERPING1	serpin family G member 1	9.36686	4.02571e-28
MSTRG.27957			8.31237	5.65122e-05
MSTRG.28177	LOC101370503	HLA class II histocompatibility antigen, DQ beta 1 chain-like	8.23831	5.21383e-05
MSTRG.17944	BCL2L14	BCL2 like 14	8.03568	1.98674e-06
ENSAMEG00000002301	RASSF10	Ras association domain family member 10	7.53607	0.00118349
ENSAMEG00000005962	UNC5C	unc-5 netrin receptor C	7.32911	0.00837801
MSTRG.25573			7.25365	0.00589136
MSTRG.27141			7.21304	0.00460387
MSTRG.4927	L1RE1	LINE-1 retrotransposable element ORF1 protein	7.07107	0.0185645
MSTRG.11168			6.86255	4.84867e-05
MSTRG.13519			6.75656	0.0482162
MSTRG.18889		LINE-1 retrotransposable element ORF2 protein	6.74594	0.0236726
MSTRG.19863			6.73933	0.0447945
MSTRG.190	CCL13	C-C motif chemokine ligand 13	6.67002	0.00199095
MSTRG.17793	CXCL10	C-X-C motif chemokine ligand 10	6.60553	2.53187e-07
MSTRG.7657			6.58523	0.0209715
MSTRG.25177			6.38618	0.0125509
MSTRG.27292		LINE-1 reverse transcriptase homolog	6.26961	7.00553e-05
MSTRG.26965		endonuclease;LINE-1 reverse transcriptase homolog	5.94188	0.00135583
MSTRG.25570		hypothetical protein M91_07252 [Bos mutus]	5.77509	0.0102878
MSTRG.26502		LINE-1 retrotransposable element ORF1	5.49529	0.00773745
MSTRG.28302			5.44874	0.0400235
MSTRG.9032	IDO1	indoleamine 2,3-dioxygenase 1	5.41838	1.94265e-07
MSTRG.12471	PRDX2	peroxiredoxin 2	5.28616	0.0157045
MSTRG.27290		hypothetical protein EGM_04010, partial [Macaca fascicularis]	5.05974	0.0177132
MSTRG.6700	BATF2	basic leucine zipper ATF-like transcription factor 2	4.99974	7.8678e-15
ENSAMEG00000012784	NECTIN2	nectin cell adhesion molecule 2	4.92975	0.0202538
MSTRG.1026	SLC25A48	solute carrier family 25 member 48	4.80652	0.0142104
MSTRG.9247			4.45256	1.22649e-08
MSTRG.14769	SMTNL1	smoothelin like 1	4.3899	7.54903e-11
MSTRG.10367	C1qb	Complement C1q subcomponent subunit B	4.30806	5.50576e-07
MSTRG.27050	LOC101347289	T-cell-specific guanine nucleotide triphosphate-binding protein 1-like	4.09167	0.000135247
MSTRG.25405	ISG15	ISG15 ubiquitin-like modifier	4.0283	1.36242e-06
MSTRG.27619			3.98163	0.0225986
MSTRG.12697			3.96035	2.16198e-13
MSTRG.4864	ZBP1	Z-DNA binding protein 1	3.89402	0.0247098
MSTRG.26501			3.87235	3.7334e-11
MSTRG.28051			3.78086	9.08065e-05
MSTRG.24519	IRF7	interferon regulatory factor 7	3.72735	5.18755e-05
MSTRG.28183			3.63711	6.60477e-05
MSTRG.12698	RSAD2	radical S-adenosyl methionine domain containing 2	3.57866	2.4712e-12
MSTRG.10366	C1QC	complement C1q C chain	3.54517	6.45775e-05
MSTRG.10365	C1QA	complement C1q A chain	3.54351	5.18e-05
MSTRG.3101			3.49513	0.00690986
MSTRG.28462			3.44506	0.0146758
MSTRG.25574	LOC100463955	T-cell-specific guanine nucleotide triphosphate-binding protein 1	3.4115	2.45574e-06
MSTRG.19568			3.38788	0.0321242
MSTRG.27291	LOC100466706	T-cell-specific guanine nucleotide triphosphate-binding protein 1	3.33753	2.49868e-05
MSTRG.14770	UBE2L6	ubiquitin conjugating enzyme E2 L6	3.28495	1.74286e-05
MSTRG.25578	LOC100464206	T-cell-specific guanine nucleotide triphosphate-binding protein 1-like	3.23523	1.34329e-07
MSTRG.25584	LOC100463703	ncRNA	3.22582	1.98557e-06
MSTRG.27049	LOC100472902	T-cell-specific guanine nucleotide triphosphate-binding protein 1-like	3.12258	0.000134435
MSTRG.25582	LOC103680629	immunity-related GTPase family M protein 1-like	3.10193	3.16747e-06
MSTRG.14927		LINE-1 reverse transcriptase homolog	3.09567	0.0257938
MSTRG.26499	LOC100466706	T-cell-specific guanine nucleotide triphosphate-binding protein 1	3.09323	0.000126553
MSTRG.29781	LOC103680629	immunity-related GTPase family M protein 1-like	3.07564	6.60477e-05
MSTRG.11288	HBM	hemoglobin subunit mu	3.07111	0.00141714
MSTRG.25532	FAM3B	family with sequence similarity 3 member B	3.06093	5.15598e-05
MSTRG.22824	DDX58	DExD/H-box helicase 58	3.05308	3.26631e-07
MSTRG.11256	LOC100481923	low affinity immunoglobulin gamma Fc region receptor III-B	3.0236	0.000134435
MSTRG.21559	NINJ1	ninjurin 1	2.98148	3.29044e-08
MSTRG.19832	HBB	Hemoglobin subunit beta	2.84696	1.6538e-06
MSTRG.28378	RARRES3	retinoic acid receptor responder 3	2.7927	0.0165695
MSTRG.3213	LOC100475782	interferon-induced protein with tetratricopeptide repeats 1	2.77429	0.000832343
MSTRG.18586		unnamed protein product [Homo sapiens]	2.73965	0.0454221
MSTRG.17629	RAB20	RAB20, member RAS oncogene family	2.70053	0.0447945
MSTRG.6382	LOC100467983	HRAS-like suppressor 3	2.64934	0.000981223
MSTRG.26794	LOC100464289	immunity-related GTPase family M protein 1	2.5886	2.91305e-05
MSTRG.11289	LOC100472013	hemoglobin subunit alpha	2.57731	1.93205e-08
MSTRG.1957	HERC5	E3 ISG15--protein ligase HERC5	2.56845	5.61088e-07
MSTRG.4895			2.55408	0.00233579
MSTRG.16263	AXL	AXL receptor tyrosine kinase	2.55213	1.93205e-08
MSTRG.18581	OAS1	2'-5'-oligoadenylate synthetase 1	2.54677	0.000391119
MSTRG.18089	Igfbp4	insulin-like growth factor binding protein 4	2.5289	0.0268135
MSTRG.4344	BPI	bactericidal/permeability-increasing protein	2.4507	0.00232303
MSTRG.3103			2.44429	0.00350159
MSTRG.16782	IL15	interleukin 15	2.43956	0.0270463
MSTRG.26207		hypothetical protein NEIPOLOT_02217, partial [Neisseria polysaccharea ATCC 43768]	2.42329	2.34221e-05
MSTRG.18585	OAS3	2'-5'-oligoadenylate synthase 3	2.41669	0.00618488
MSTRG.26359	SLAMF8	SLAM family member 8	2.39659	7.87647e-06
MSTRG.19528	MX2	MX dynamin like GTPase 2	2.39524	6.92043e-08
MSTRG.4560	P2RY6	pyrimidinergic receptor P2Y6	2.38188	0.00286328
MSTRG.27622	LOC105855951	HLA class I histocompatibility antigen, B-37 alpha chain-like	2.35993	1.19524e-11
MSTRG.26357			2.30691	6.92043e-08
MSTRG.8672	FOXS1	forkhead box S1	2.20639	7.13811e-05
MSTRG.4863	ZBP1	Z-DNA binding protein 1	2.20189	0.000138846
MSTRG.7811	LOC100465831	guanylate-binding protein 1	2.16269	0.00100016
MSTRG.4559			2.14338	0.0146758
MSTRG.23449	LOC103672034	T-lymphocyte surface antigen Ly-9-like	2.14054	0.00695819
MSTRG.5462	IL23A	interleukin 23 subunit alpha	2.11921	0.00770188
MSTRG.29567			2.11655	0.0299036
MSTRG.5788	LAP3	leucine aminopeptidase 3	2.05895	0.0146758
MSTRG.26208		hypothetical protein M91_14620 [Bos mutus]	2.04121	0.000135247
MSTRG.27005	LOC103676430	apolipoprotein L3-like	2.02689	0.0126226
MSTRG.29396	LOC103680633	interferon-inducible GTPase 1-like	2.00572	0.0310464
MSTRG.3111	PSMB9	proteasome subunit beta 9	1.97144	0.0189947
MSTRG.1958	HERC5	HECT and RLD domain containing E3 ubiquitin protein ligase 5	1.97016	0.00174292
MSTRG.3112	TAP1	transporter 1, ATP binding cassette subfamily B member	1.96322	0.00272607
MSTRG.28229			1.95551	0.014639
MSTRG.18584	OAS2	2'-5'-oligoadenylate synthetase 2	1.95481	1.68068e-05
MSTRG.2429	NEURL1	neuralized E3 ubiquitin protein ligase 1	1.94784	0.000196109
MSTRG.27420	LOC103676427	apolipoprotein L3-like	1.94586	0.000420256
MSTRG.1832			1.89487	0.00232303
MSTRG.710	BST2	bone marrow stromal cell antigen 2	1.83947	0.00376654
MSTRG.741	IL12RB1	interleukin 12 receptor subunit beta 1	1.81638	0.00119579
MSTRG.3820	RTP4	receptor transporter protein 4	1.81321	0.00491237
MSTRG.26966	LOC100463955	T-cell-specific guanine nucleotide triphosphate-binding protein 1	1.76856	0.0431851
MSTRG.22800			1.74315	0.0152999
MSTRG.20514			1.7393	0.0124272
MSTRG.14439	GBP6	Guanylate-binding protein 6	1.73751	0.0482162
MSTRG.14607		hypothetical protein M91_08065 [Bos mutus]; Retrovirus-related Pol poly LINE-1	1.69444	0.0257938
MSTRG.15804	RGS1	regulator of G protein signaling 1	1.672	0.00581401
MSTRG.12357	DMKN	hypothetical protein PANDA_009755 [Ailuropoda melanoleuca]	1.65998	0.0485995
MSTRG.19657	ABCC3	Canalicular multispecific organic anion transporter 2	1.65	0.00734165
MSTRG.5463	STAT2	signal transducer and activator of transcription 2	1.63433	0.0133749
MSTRG.25608	LOC100467706	plexin-A4	1.62351	8.92992e-05
MSTRG.26614		ENSAMEG00000006365	1.59391	0.00342979
MSTRG.28604			1.57701	0.000175889
MSTRG.8282	STAT1	signal transducer and activator of transcription 1	1.57594	0.0171479
MSTRG.13948	DHX58	DExH-box helicase 58	1.5747	0.00795809
MSTRG.17283	TTC34	tetratricopeptide repeat domain 34	1.57183	0.0133749
MSTRG.8459	PDGFRB	platelet derived growth factor receptor beta	1.57005	0.0492938
MSTRG.23891	ACSM1	acyl-CoA synthetase medium chain family member 1	1.54797	0.0270463
MSTRG.17748			1.5459	0.0424588
MSTRG.3115	TAP2	transporter 2, ATP binding cassette subfamily B member	1.50382	0.0224182
MSTRG.678	HSH2D	hematopoietic SH2 domain containing	1.50029	0.00975948
MSTRG.11445	EPSTI1	epithelial stromal interaction 1	1.47351	0.0167318
MSTRG.27417	LOC100479458	GTPase IMAP family member 4	1.46907	0.0338456
MSTRG.8843	LGALS3BP	galectin 3 binding protein	1.45616	0.00719121
MSTRG.13530	RNF213	ring finger protein 213	1.45286	0.000440437
MSTRG.7254	IFIT5	interferon induced protein with tetratricopeptide repeats 5	1.43152	0.0195689
MSTRG.20466	PLXNA4	plexin A4	1.38851	0.0158033
MSTRG.15626			1.35425	0.0247098
MSTRG.21341			1.34354	0.0182576
MSTRG.16788		LINE-1 retrotransposable element ORF2	1.34333	0.0134018
MSTRG.13433	IFI44	interferon induced protein 44	1.30486	0.0192753
MSTRG.14097	CD163	CD163 molecule	1.30058	0.0126226
MSTRG.7890	DOCK7	dedicator of cytokinesis 7	1.26826	0.0438699
MSTRG.22798	LOC100464780	DLA class II histocompatibility antigen, DR-1 beta chain	1.26394	0.0101452
MSTRG.27364	LOC102746195	DLA class I histocompatibility antigen, A9/A9 alpha chain-like	1.26363	0.0202538
MSTRG.14250	LOC100465168	caspase-12-like	1.25679	0.0172485
MSTRG.21340	PARP9	poly(ADP-ribose) polymerase family member 9	1.14884	0.0447945
MSTRG.27615			1.11529	0.0142104
MSTRG.27960	LOC100464718	GTPase IMAP family member 4	1.0938	0.017485
MSTRG.24137	MOGAT1	monoacylglycerol O-acyltransferase 1	-1.19284	0.0152999
MSTRG.10346	JCHAIN	joining chain of multimeric IgA and IgM	-1.30603	0.0464655
MSTRG.1833	IL1R1	interleukin 1 receptor type 1	-1.32858	0.0252792
MSTRG.20011	LOC103672539	complement component receptor 1-like protein	-1.45921	0.0265914
MSTRG.13349	MGAM	maltase-glucoamylase	-1.48064	0.0265914
MSTRG.14272	IGKC	Immunoglobulin kappa constant	-1.4938	0.00108653
MSTRG.23359	C4BPB	complement component 4 binding protein beta	-1.49788	0.0126226
MSTRG.19224	EEF1A2	eukaryotic translation elongation factor 1 alpha 2	-1.50383	0.00197137
MSTRG.19707	TRDC	hypothetical protein PANDA_015641, partial [Ailuropoda melanoleuca]	-1.54869	0.0165695
MSTRG.14815	AGTRAP	angiotensin II receptor associated protein	-1.55658	0.0492938
MSTRG.6837		endonuclease/reverse transcriptase [Sus scrofa]	-1.56999	0.0362091
MSTRG.27395	IGHV3-23	immunoglobulin heavy chain, partial [Homo sapiens]; Immunoglobulin heavy variable 3-23	-1.57075	0.0146758
MSTRG.26900	IGLV2-8	Immunoglobulin lambda variable 2-8	-1.57822	0.027529
MSTRG.27167		hypothetical protein PANDA_022184, partial [Ailuropoda melanoleuca]	-1.60363	0.0447945
MSTRG.13555	AATK	apoptosis associated tyrosine kinase	-1.6522	0.000125014
MSTRG.2111	LOC101695402	uncharacterized LOC101695402 [ Mustela putorius furo (domestic ferret) ]	-1.66117	0.0257072
MSTRG.28497			-1.67987	0.0383774
MSTRG.6255	PKP2	plakophilin 2	-1.69899	0.0126226
MSTRG.19226		LINE-1 retrotransposable element ORF2	-1.77507	0.0257072
MSTRG.12326	ADORA2B	adenosine A2b receptor	-1.80254	0.0032842
MSTRG.4615	EAF1	ELL associated factor 1	-1.80449	0.0247098
MSTRG.14280	IGKV3-11	Immunoglobulin kappa variable 3-11	-1.8272	0.00981351
MSTRG.27637	IGLV3-21	Immunoglobulin lambda variable 3-21	-1.83778	0.00186152
MSTRG.22083	LOC100473313	long-chain-fatty-acid--CoA ligase ACSBG2-like	-1.8668	0.00780542
MSTRG.27372	IGLV3-21	Ig lambda chain V-1 region; Immunoglobulin lambda variable 3-21	-1.8739	0.00619822
MSTRG.3986	TGFBR1	transforming growth factor beta receptor 1	-1.92786	0.0185645
MSTRG.1970	LOC712245	uncharacterized LOC712245 [ Macaca mulatta (Rhesus monkey) ]	-1.9281	0.0261777
MSTRG.20203			-1.95611	0.017587
MSTRG.20201	LOC105863300	extensin-3-like [ Microcebus murinus (gray mouse lemur) ]	-1.95709	7.13811e-05
MSTRG.2747			-1.97877	5.21383e-05
MSTRG.9362	SLC4A11	solute carrier family 4 member 11	-2.01283	0.00135583
MSTRG.17977	PTGS2	prostaglandin-endoperoxide synthase 2	-2.01489	0.000125014
MSTRG.19414	LOC100475588	integrin alpha-D	-2.01572	0.00100517
MSTRG.25526	PANDA_020697	T-cell receptor gamma chain C region 5/10-13	-2.03671	1.74286e-05
MSTRG.28599		Ig gamma-3 chain C region	-2.04888	9.32155e-06
MSTRG.27095			-2.09218	0.0257938
MSTRG.2749	LOC100464472	uncharacterized LOC100464472 [ Ailuropoda melanoleuca (giant panda) ]	-2.11169	0.00233657
MSTRG.27223	TRG	uncharacterized TRG [ Felis catus (domestic cat) ]	-2.32163	0.000240685
MSTRG.10657			-2.34155	0.0170929
MSTRG.26801			-2.38711	0.0216123
MSTRG.16925			-2.44228	0.0151818
MSTRG.23258			-2.54785	0.000608445
MSTRG.16924			-2.56974	0.0247098
MSTRG.26753	LOC105234997	CMRF35-like molecule 7	-2.64956	0.00083418
MSTRG.19412	COX6A2	cytochrome c oxidase subunit 6A2	-2.69249	5.81852e-05
MSTRG.26902	IGLV2-8	Immunoglobulin lambda variable 2-8	-2.69346	0.01203
MSTRG.23360	C4BPA	complement component 4 binding protein alpha	-2.76019	3.69641e-06
MSTRG.10307	PRDM16	PR/SET domain 16	-2.82945	0.001152
MSTRG.4840		unnamed protein product [Canis lupus familiaris]; LINE-1 reverse transcriptase	-3.02057	0.0257072
MSTRG.23358	LOC100483222	apolipoprotein R	-3.13794	0.0003443
MSTRG.22018	BCAR1	BCAR1, Cas family scaffolding protein	-3.19708	0.00128019
MSTRG.24469	DUSP23	Dual specificity protein phosphatase 23	-3.33619	0.000161464
MSTRG.19736			-3.53322	0.0197056
MSTRG.25483			-3.8037	0.000855484
MSTRG.22445	LOC100468283	leukocyte immunoglobulin-like receptor subfamily A member 6	-3.80961	0.000458433
MSTRG.13832			-3.84063	0.00539548
MSTRG.15313			-4.35731	0.0247098
MSTRG.25023	PABPN1L	poly(A) binding protein, nuclear 1-like (cytoplasmic)	-5.88867	0.0216123
MSTRG.10093	Pol	LINE-1 retrotransposable element ORF2 protein	-6.07192	0.000277665
MSTRG.15314			-6.19633	0.0108163
MSTRG.5838	Gab2	GRB2 associated binding protein 2	-6.71955	0.00141714
MSTRG.24868			-11.4828	7.8678e-15
MSTRG.28001	CXCR2	C-X-C chemokine receptor type 2	-14.3414	0.0257938
MSTRG.14860	LOC101551452	tripartite motif-containing protein 38-like	-16.6809	0.00100517
