# Supplementary material for: Transcriptome analysis reveals immune-related gene expression changes with age in giant panda (Ailuropoda melanoleuca) blood
Source: Aging (Albany NY). 2019 Jan 14;11(1):249–62. doi: 10.18632/aging.101747 (PMC6339791; doi:10.18632/aging.101747)
Supplement: Supplementary Table 3 [file aging-11-101747-s004.xlsx]

## Sheet: UP_clusterprofile
Supplementary Table 3. All significant enriched GO terms of up-regulated genes in old giant pandas compared to young giant pandas.
ID	Description	GeneRatio	BgRatio	pvalue	p.adjust	qvalue	geneID	Count	ontology
GO:0006955	immune response	13/102	194/20574	1.39673e-11	4.67904e-09	3.83733e-09	MSTRG.27364/MSTRG.22798/MSTRG.13433/MSTRG.18584/MSTRG.5462/MSTRG.27622/MSTRG.18585/MSTRG.16782/MSTRG.4344/MSTRG.18581/MSTRG.17793/MSTRG.190/MSTRG.22795	13	BP
GO:0045071	negative regulation of viral genome replication	6/102	26/20574	2.71841e-09	3.03556e-07	2.48949e-07	MSTRG.7254/MSTRG.710/MSTRG.19528/MSTRG.18585/MSTRG.18581/MSTRG.12698	6	BP
GO:0051607	defense response to virus	8/102	85/20574	9.70198e-09	8.12541e-07	6.66373e-07	MSTRG.7254/MSTRG.5463/MSTRG.710/MSTRG.18584/MSTRG.18585/MSTRG.18581/MSTRG.12698/MSTRG.17793	8	BP
GO:0009615	response to virus	7/102	61/20574	2.0935e-08	1.40265e-06	1.15032e-06	MSTRG.13433/MSTRG.13948/MSTRG.710/MSTRG.19528/MSTRG.18581/MSTRG.22824/MSTRG.12698	7	BP
GO:0002827	positive regulation of T-helper 1 type immune response	3/102	11/20574	1.89652e-05	0.000907622	0.00074435	MSTRG.741/MSTRG.5462/MSTRG.28177	3	BP
GO:0030334	regulation of cell migration	4/102	57/20574	0.000183823	0.00559823	0.00459117	MSTRG.20466/MSTRG.25608/MSTRG.22824/ENSAMEG00000005962	4	BP
GO:0071346	cellular response to interferon-gamma	3/102	26/20574	0.000283116	0.00729568	0.00598326	MSTRG.741/MSTRG.190/MSTRG.28177	3	BP
GO:0002230	positive regulation of defense response to virus by host	3/102	32/20574	0.000528566	0.0126478	0.0103726	MSTRG.741/MSTRG.5462/MSTRG.22824	3	BP
GO:0001779	natural killer cell differentiation	2/102	10/20574	0.00106722	0.0198622	0.0162892	MSTRG.16782/MSTRG.16263	2	BP
GO:0021612	facial nerve structural organization	2/102	10/20574	0.00106722	0.0198622	0.0162892	MSTRG.20466/MSTRG.25608	2	BP
GO:0001916	positive regulation of T cell mediated cytotoxicity	2/102	11/20574	0.00130017	0.0217778	0.0178602	MSTRG.3115/MSTRG.5462	2	BP
GO:0032740	positive regulation of interleukin-17 production	2/102	11/20574	0.00130017	0.0217778	0.0178602	MSTRG.5462/MSTRG.16782	2	BP
GO:0002504	antigen processing and presentation of peptide or polysaccharide antigen via MHC class II	2/102	12/20574	0.00155516	0.0236809	0.0194209	MSTRG.22798/MSTRG.22795	2	BP
GO:0090026	positive regulation of monocyte chemotaxis	2/102	13/20574	0.00183199	0.023904	0.0196039	MSTRG.17793/MSTRG.190	2	BP
GO:0032481	positive regulation of type I interferon production	2/102	14/20574	0.00213042	0.02461	0.0201829	MSTRG.13948/MSTRG.24519	2	BP
GO:0035458	cellular response to interferon-beta	2/102	14/20574	0.00213042	0.02461	0.0201829	MSTRG.8282/MSTRG.29396	2	BP
GO:0048485	sympathetic nervous system development	2/102	14/20574	0.00213042	0.02461	0.0201829	MSTRG.20466/MSTRG.25608	2	BP
GO:0032735	positive regulation of interleukin-12 production	2/102	16/20574	0.00279125	0.0301635	0.0247374	MSTRG.5462/MSTRG.9032	2	BP
GO:0032728	positive regulation of interferon-beta production	2/102	17/20574	0.00315322	0.0320099	0.0262517	MSTRG.22824/MSTRG.24519	2	BP
GO:0042104	positive regulation of activated T cell proliferation	2/102	17/20574	0.00315322	0.0320099	0.0262517	MSTRG.741/MSTRG.5462	2	BP
GO:0042157	lipoprotein metabolic process	2/102	19/20574	0.0039392	0.0388127	0.0318307	MSTRG.27420/MSTRG.27005	2	BP
GO:0006952	defense response	3/102	67/20574	0.00450363	0.0431061	0.0353518	MSTRG.3112/MSTRG.29396/MSTRG.17793	3	BP
GO:0042613	MHC class II protein complex	3/102	17/20574	7.64859e-05	0.00284697	0.00233483	MSTRG.22798/MSTRG.28177/MSTRG.22795	3	CC
GO:0072562	blood microparticle	5/102	98/20574	0.000127893	0.00428443	0.0035137	MSTRG.8843/MSTRG.23891/MSTRG.10366/MSTRG.10367/MSTRG.14771	5	CC
GO:0005581	collagen trimer	3/102	35/20574	0.000689994	0.0154099	0.0126378	MSTRG.10365/MSTRG.10366/MSTRG.10367	3	CC
GO:0042612	MHC class I protein complex	2/102	10/20574	0.00106722	0.0198622	0.0162892	MSTRG.27364/MSTRG.27622	2	CC
GO:0005771	multivesicular body	2/102	12/20574	0.00155516	0.0236809	0.0194209	MSTRG.710/MSTRG.28177	2	CC
GO:0005525	GTP binding	15/102	370/20574	4.23767e-10	7.09809e-08	5.82122e-08	MSTRG.27960/MSTRG.27417/MSTRG.14439/MSTRG.29396/MSTRG.7811/MSTRG.19528/MSTRG.26794/MSTRG.17629/MSTRG.29781/MSTRG.27049/MSTRG.25584/MSTRG.25578/MSTRG.27291/MSTRG.25574/MSTRG.27050	15	MF
GO:0003725	double-stranded RNA binding	5/102	54/20574	7.07595e-06	0.000395074	0.000324004	MSTRG.13948/MSTRG.18584/MSTRG.18585/MSTRG.18581/MSTRG.22824	5	MF
GO:0019825	oxygen binding	3/102	12/20574	2.51959e-05	0.00105508	0.000865279	MSTRG.11289/MSTRG.19832/MSTRG.11288	3	MF
GO:0042605	peptide antigen binding	3/102	25/20574	0.000251352	0.0070169	0.00575463	MSTRG.27364/MSTRG.27622/MSTRG.28177	3	MF
GO:0020037	heme binding	4/102	103/20574	0.00172891	0.023904	0.0196039	MSTRG.11289/MSTRG.19832/MSTRG.11288/MSTRG.9032	4	MF
GO:0017154	semaphorin receptor activity	2/102	13/20574	0.00183199	0.023904	0.0196039	MSTRG.20466/MSTRG.25608	2	MF
GO:0005125	cytokine activity	4/102	105/20574	0.00185524	0.023904	0.0196039	MSTRG.5462/MSTRG.16782/MSTRG.17793/MSTRG.190	4	MF
GO:0003727	single-stranded RNA binding	5/102	189/20574	0.00251745	0.0281115	0.0230546	MSTRG.7254/MSTRG.13948/MSTRG.22824/MSTRG.26502/MSTRG.4927	5	MF
GO:0004623	phospholipase A2 activity	2/102	22/20574	0.00527015	0.0490417	0.0402196	MSTRG.6382/MSTRG.28378	2	MF
