# Supplementary material for: Transcriptome analysis reveals immune-related gene expression changes with age in giant panda (Ailuropoda melanoleuca) blood
Source: Aging (Albany NY). 2019 Jan 14;11(1):249–62. doi: 10.18632/aging.101747 (PMC6339791; doi:10.18632/aging.101747)
Supplement: Supplementary Table 4 [file aging-11-101747-s005.xlsx]

## Sheet: DOWN_clusterprofile
Supplementary Table. 4 All significant enriched GO terms of down-regulated genes in old giant pandas compared to young giant pandas.
ID	Description	GeneRatio	BgRatio	pvalue	p.adjust	qvalue	geneID	Count	ontology
GO:0006958	complement activation, classical pathway	3/38	35/20574	3.65e-05	0.00245925	0.00143531	MSTRG.27372/MSTRG.27395/MSTRG.14272	3	BP
GO:0050853	B cell receptor signaling pathway	3/38	39/20574	5.07e-05	0.00256235	0.00149548	MSTRG.22018/MSTRG.27395/MSTRG.14272	3	BP
GO:0038095	Fc-epsilon receptor signaling pathway	3/38	47/20574	8.91e-05	0.00360013	0.00210117	MSTRG.5838/MSTRG.27395/MSTRG.14272	3	BP
GO:0050871	positive regulation of B cell activation	2/38	18/20574	0.000498834	0.0143949	0.00840141	MSTRG.27395/MSTRG.14272	2	BP
GO:0006910	phagocytosis, recognition	2/38	20/20574	0.000618025	0.0156051	0.00910773	MSTRG.27395/MSTRG.14272	2	BP
GO:0006911	phagocytosis, engulfment	2/38	24/20574	0.000893589	0.0200561	0.0117055	MSTRG.27395/MSTRG.14272	2	BP
GO:0001895	retina homeostasis	2/38	27/20574	0.00113245	0.0203065	0.0118516	MSTRG.14272/MSTRG.10346	2	BP
GO:0050873	brown fat cell differentiation	2/38	27/20574	0.00113245	0.0203065	0.0118516	MSTRG.10307/MSTRG.17977	2	BP
GO:0008217	regulation of blood pressure	2/38	29/20574	0.00130685	0.0203065	0.0118516	MSTRG.17977/MSTRG.14815	2	BP
GO:0038096	Fc-gamma receptor signaling pathway involved in phagocytosis	2/38	32/20574	0.00159099	0.0229556	0.0133978	MSTRG.27395/MSTRG.14272	2	BP
GO:0045087	innate immune response	3/38	140/20574	0.00218545	0.0294308	0.0171769	MSTRG.27395/MSTRG.14272/MSTRG.10346	3	BP
GO:0045732	positive regulation of protein catabolic process	2/38	50/20574	0.00384799	0.0457232	0.0266858	MSTRG.23360/MSTRG.23359	2	BP
GO:0072562	blood microparticle	4/38	98/20574	3.16e-05	0.00245925	0.00143531	MSTRG.23360/MSTRG.27395/MSTRG.14272/MSTRG.10346	4	CC
GO:0042571	immunoglobulin complex, circulating	2/38	10/20574	0.000148091	0.00498571	0.00290985	MSTRG.27395/MSTRG.14272	2	CC
GO:0009897	external side of plasma membrane	3/38	179/20574	0.00436822	0.0490212	0.0286106	MSTRG.27395/MSTRG.19707/MSTRG.14272	3	CC
GO:0034987	immunoglobulin receptor binding	3/38	17/20574	3.88e-06	0.000784321	0.000457759	MSTRG.27395/MSTRG.14272/MSTRG.10346	3	MF
GO:0003823	antigen binding	2/38	29/20574	0.00130685	0.0203065	0.0118516	MSTRG.27395/MSTRG.14272	2	MF
GO:0046332	SMAD binding	2/38	41/20574	0.00260287	0.0328613	0.0191791	MSTRG.10307/MSTRG.3986	2	MF
